# Supplementary material for: Preservation of spatial memory and neuroprotection by the fatty acid amide hydrolase inhibitor URB597 in a rat model of vascular dementia
Source: PubMed Central journal article supplement — Ann Transl Med. 2021 Feb;9(3):228. doi: 10.21037/atm-20-4431 (PMC7940933; doi:10.21037/atm-20-4431), 2021-02
Supplement: atm-09-03-228-dss.pdf [file atm-09-03-228-dss.pdf]

## Data Sharing Statement

|                     |                                                                                                                                                    |                                                                                                                  |
|---------------------|----------------------------------------------------------------------------------------------------------------------------------------------------|------------------------------------------------------------------------------------------------------------------|
| <b>Article Info</b> | <a href="http://dx.doi.org/10.21037/atm-20-4431">http://dx.doi.org/10.21037/atm-20-4431</a>                                                        |                                                                                                                  |
| <b>Item</b>         | <b>Question</b>                                                                                                                                    | <b>Authors' Response<br/>(place "-" if not applicable)</b>                                                       |
| 1                   | Would you like to share data collected for your study to others?                                                                                   | Yes                                                                                                              |
| 2                   | If not, would you like to share the reason for your decision?                                                                                      | -                                                                                                                |
| 3                   | What data in particular will be shared?                                                                                                            | The animal model data in particular will be shared.                                                              |
| 4                   | Any other documents will be share? Such as study protocol, statistical analysis plan, informed consent form, clinical study report, analytic code. | The statistical data will be shared if requested.                                                                |
| 5                   | When will data availability begin?                                                                                                                 | From the publication date.                                                                                       |
| 6                   | When will data availability end?                                                                                                                   | One year within the publication date, since the technique or survival date may be updated over time.             |
| 7                   | To whom will you share the data?                                                                                                                   | Students or researchers who are interested in chronic cerebral hypoperfusion                                     |
| 8                   | For what type of analysis or purpose?                                                                                                              | study                                                                                                            |
| 9                   | How or where can the data/documents be obtained?                                                                                                   | Correspondence author, E-mail: <a href="mailto:wdpboj@126.com">wdpboj@126.com</a> (Dr. Wang)                     |
| 10                  | Any other restrictions?                                                                                                                            | We may balance the potential benefits and risks for each request and then provide the data that could be shared. |
